# Supplementary material for: Analysis of the Interaction between DNA Aptamers and Cytochrome C on the Surface of Lipid Films and on the MUA Monolayer: A QCM-D Study
Source: MDPI journal article supplement (doi:10.3390/bios13020251), 2023-02-09
Supplement: s1 [file s1]

Supporting Information

# Analysis of the Interaction Between DNA Aptamers and Cytochrome C on the Surface of Lipid Films and on the MUA Monolayer: A QCM-D Study <sup>†</sup>

Marek Tatarko, Sandro Spagnolo, Martin Csiba, Veronika Šubjaková and Tibor Hianik <sup>\*</sup>

Faculty of Mathematics, Physics and Informatics, Comenius University, Mlynská dolina F1, 842 48 Bratislava, Slovakia

<sup>\*</sup> Correspondence: [tibor.hianik@fmph.uniba.sk](mailto:tibor.hianik@fmph.uniba.sk)

<sup>†</sup> This paper is an extended version of our paper published in Tatarko, M.; Spagnolo, S.; Hianik, T. Monitoring of cytochrome c adsorption at supported lipid membranes using multiharmonic QCM method. In *Proceedings of the 2nd International Electronic Conference on Biosensors*, 14–18 February 2022; MDPI: Basel, Switzerland, doi:10.3390/IECB2022-12271.

## S1. Electron microscopy image of AuNWs

Gold nanowires (AuNWs) were observed with standard Secondary Electron detector and in transmission mode with a STEM detector using Electron microscope EVO LS15 (Zeiss, Oberkochen, Germany) with following parameters: accelerating voltage 30 kV, Iprobe 100 pA. Length size of AuNWs was evaluated as  $3.22 \pm 0.38 \mu\text{m}$  using ImageJ software.

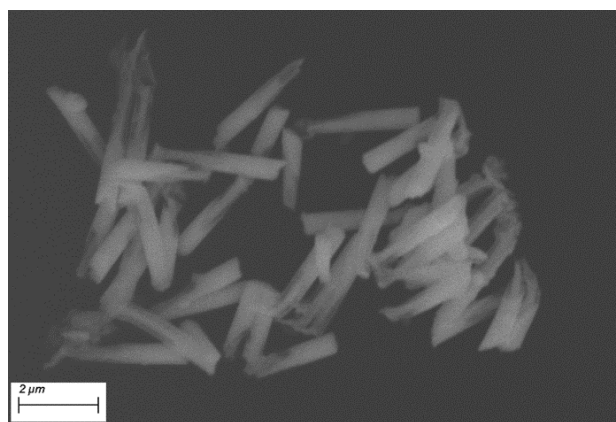

**Figure S1.** Electron microscope image observed with standard Secondary Electron detector of synthesized AuNWs.

## S2. Interaction of the gold nanowires with cyt c covalently immobilized at the surface of MUA chemisorbed at gold layer of the quartz crystal

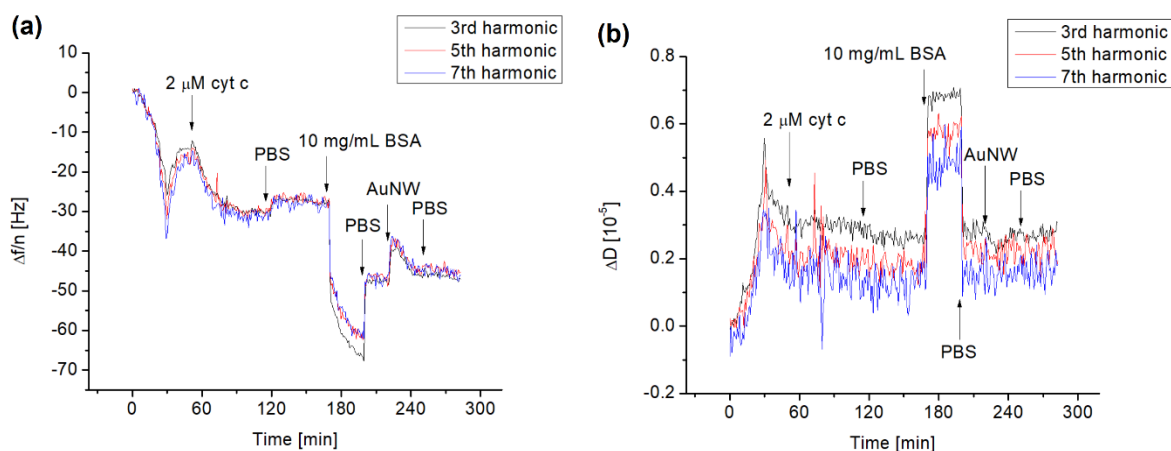

**Figure S2.** The kinetics of the changes of normalized resonant frequency (a) and dissipation (b) for 3<sup>rd</sup>, 5<sup>th</sup> and 7<sup>th</sup> harmonic frequencies vs. time following addition to the MUA surface of 2  $\mu\text{M}$  cyt c, 10 mg/mL BSA and unmodified gold nanowires (AuNW). The moments of addition of cyt c, BSA, AuNW and PBS wash are shown by arrows.

## S3. Interaction of the DNA aptamers with cyt c covalently immobilized at the surface of MUA chemisorbed at gold layer of the quartz crystal

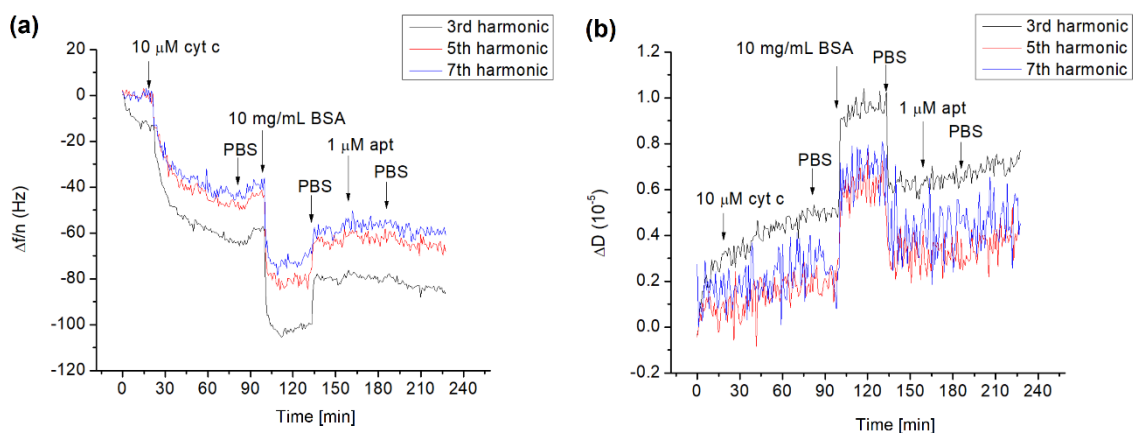

**Figure S3.** The kinetics of the changes of normalized resonant frequency (a) and dissipation (b) for 3<sup>rd</sup>, 5<sup>th</sup> and 7<sup>th</sup> harmonic frequencies vs. time following addition to the MUA surface of 2  $\mu\text{M}$  cyt c, 10 mg/mL BSA and DNA aptamers specific to cyt c (apt). The moments of addition of cyt c, BSA, aptamer and PBS wash are shown by arrows.
